# Supplementary material for: Can Invasiveness in Freshwater Fishes Be Predicted From Life-History Traits?
Source: Frontiers journal article supplement (doi:10.3389/fevo.2020.605287), 2020-12-23
Supplement: Table_1.xlsx [file Table_1.xlsx]

## Sheet: Dataset
Supplementary information Table S1. Data sources for Table 1 and figures of main text, with invasiveness status (no / transition [trans] / yes) predicted by the model proposed by Copp and Fox( 2007) and a priori as reported by sources (observed),
which is based on the relationship between mean age at maturity (AaM) and juvenile growth (L2 = total length at age 2) as described in Fox (1994). Unless otherwise indicated, the number of fish reported as processed in the laboratory was
used as an estimator of a priori invasiveness status, the threshold <100 fish = no and ≥100 fish = yes. Where additional information sources were used to determinea priori invasiveness status, these are described. Geographical coordinates
are presented as given in the sources publications.
Site		Coordinates					Invasiveness status
No.	Country	Latitude	Longitude	Site name	L2	AaM	predicted	observed	A priori classification source
1	Belgium (Flanders)	50˚58'N	05˚05'E	Webbekomsbroek Pond	89	1.63	yes	yes	Verreycken et al. (2007), and numbers of processed fish reported in Cucherousset et al. (2009)
2	Belgium (Flanders)	50˚57'N	05˚18'E	Slangebeek Stream	60	2.45	no	no	Verreycken et al. (2007), and numbers of processed fish reported in Cucherousset et al. (2009)
3	France	43˚30'N	04˚40'E	Fumemorte Canal	72	1.8	trans	yes	Crivelli & Mestre (1988) & Fox and Crivelli (2001) & Poulet (2004), but in a decline in numbers has been reported (Costa 2005)
4	France	43˚28'N	04˚54'E	Sollac Marsh	73	2.3	trans	no	Fox and Crivelli 1998) & Fox and Crivelli (2001) pumpkinseed dominant species
5	France	43˚32'N	04˚45'E	Ligagneau Canal	70	1.3	yes	yes	Fox and Crivelli (2001) pumpkinseed dominant species
6	France	43˚21'N	04˚29'E	River Rhône	75	2.38	trans	no	Fox & Copp (2014), Non-invasive assumed, based on low number (62) of specimens cited in article's database (unpublished data, M. Fox and A. Crivelli)
7	France	47'57'06N	06'44'60E	Saulxures-sur-Moselotte gravel pit	76	2	trans	no	Masson et al. (2015), low number of specimens reported and low abundance confirmed in Masson et al. (2011) and Vanacker (2011).
8	France	48'03'10N	06'35'43E	Saint Nabord gravel pit	71	2.1	trans	yes	Masson et al. (2015), high number of specimens reported and very high abundance confirmed in Masson et al. (2011) and Vanacker (2011).
9	France	48'19'20N	06'22'23E	Châtel-sur-Moselle gravel pit	64	2.1	no	yes	Masson et al. (2015), high number of specimens reported and high abundance confirmed in Masson et al. (2011) and Vanacker (2011).
10	France	48'53'27N	06'04'19E	Pont-à-Mousson gravel pit	66	1.4	trans	yes	Masson et al. (2015), high number of specimens reported and high abundance confirmed in Masson et al. (2011) and Vanacker (2011).
11	France	49'04'38N	06'05'36E	Canal de Jouy	78	1.4	yes	no	Masson et al. (2015), low number of specimens reported and low abundance confirmed in Masson et al. (2011) and Vanacker (2011).
12	France	49'09'54N	06'12'19E	Lagune La Maxe	73	1.4	yes	no	Masson et al. (2015), low number of specimens reported and low-to-moderate abundance confirmed in Masson et al. (2011) and Vanacker (2011).
13	France	49'10'48N	06'11'27E	La Maxe gravel pit	78	2	trans	yes	Masson et al. (2015), high number of specimens reported and very high abundance confirmed in Masson et al. (2011) and Vanacker (2011).
14	France	49'11'23N	06'11'35E	Argancy gravel pit	68	1.9	trans	no	Masson et al. (2015), elevated number of specimens reported but multiple capture methodes needed to obtain them so apparent low-to-moderate abundance (Masson et al. 2011; Vanacker 2011).
15	France	49'16'02N	06'11'27E	Mondelange gravel pit	65	2.1	trans	no	Masson et al. (2015), low number of specimens reported and low-to-moderate abundance confirmed in Masson et al. (2011) and Vanacker (2011).
16	France	49'25'15N	06'16'00E	Sentzich gravel pit	72	2.2	trans	yes	Masson et al. (2015), high number of specimens reported and moderately high abundance confirmed in Masson et al. (2011) and Vanacker (2011).
17	France	49'25'20N	06'14'09E	Mirgenbach Reservoir	70	1.3	yes	yes	Dembski et al. (2006) & Masson et al. (2015), Invasive assumed, based on high number of specimens cited in Masson et al. (2015)
18	France	48'35'24N	06'09'39E	Richardmesnil gravel pit	78	2	trans	yes	Masson et al. (draft MS of 2015), Invasive assumed, based on high number (134) of specimens cited in table of draft MS.
19	France	49'25'50N	06'18'26E	River Moselle backwaters	92	1.6	yes	no	Masson et al. (draft MS of 2015), non-invasive based on number (86) fish cited in table of draft MS, and confirmed by G. Masson (pers. comm. to GHC).
20	France	47˚22'N	02˚19'W	Brière Marsh	83	1	yes	yes	Cucherousset et al. (2007, 2008)
21	France	47˚05'N	01˚39'W	Grand-Lieu Lake	73	1.71	trans	no	Carpentier et al. (2004) states "Lepomis gibbosus were scarce."
22	GB (England)	51˚01'N	00˚04'E	Boringwheel Lake	53	3.2	no	no	Villeneuve et al. (2005), supported by the underlying CPUE database.
23a	GB (England)	51˚01'N	00˚04'E	Batts Stream Cackle Street (2003)	57	3.3	no	no	Villeneuve et al. (2005), supported by the underlying CPUE database.
23b	GB (England)	51˚01'N	00˚04'E	Batts Stream Cackle Street (2006)	61	2.5	no	no	Klaar et al. (2004), Villeneuve et al. (2005) & Cucherousset et al. (2009), Copp et al. (2010), absence of reproduction and overall low numbers in the stream.
24a	GB (England)	51˚01'N	00˚04'E	Watersmeet Garden pond (2010)	60	2.4	no	no	Fobert et al. (2013), relatively low numbers (n = 91) processed, which was all the fish we could catch.
24b	GB (England)	51˚01'N	00˚04'E	Watersmeet Garden pond (2016)	67	1.2	trans	no	The present study, relatively low numbers processed (elecrtrofishing in June, n = 50; minnow traps in July, n = 80), being all the fish we could catch.
25	GB (England)	50˚59'N	00˚04'E	Powdermill Upper Pond	77	2	trans	no	Villeneuve et al. (2005), supported by the underlying CPUE database.
26	GB (England)	50˚59'N	00˚04'E	Powdermill Side Pond	78	2.2	trans	no	Villeneuve et al. (2005), supported by the underlying CPUE database.
27	GB (England)	50˚59'N	00˚04'E	Powdermill Lower Pond	72	2.1	trans	no	Villeneuve et al. (2005), supported by the underlying CPUE database.
28	GB (England)	51˚01'N	00˚00'E	Tanyard Fishery Pond 2	70	2.1	trans	no	Villeneuve et al. (2005), supported by the underlying CPUE database.
29	GB (England)	51˚01'N	00˚00'E	Tanyard Fishery Pond 3	58	2.7	no	no	Villeneuve et al. (2005), supported by the underlying CPUE database.
30	GB (England)	51˚01'N	00˚00'E	Tanyard Fishery Pond 4	58	3.4	no	no	Villeneuve et al. (2005), supported by the underlying CPUE database.
31	GB (England)	51˚01'N	00˚00'E	Tanyard Fishery Pond 5	59	2.8	no	no	Villeneuve et al. (2005), supported by the underlying CPUE database.
32	GB (England)	51˚01'N	00˚00'E	Tanyard Fishery Pond 6	68	2	trans	no	Villeneuve et al. (2005), supported by the underlying CPUE database.
33	GB (England)	51˚01'N	00˚00'E	Tanyard Fishery Pond 7	59	2.6	no	no	Villeneuve et al. (2005), supported by the underlying CPUE database.
34	GB (England)	51˚07'N	00˚09'W	Milton Mount Pond	71	2.1	trans	no	Villeneuve et al. (2005), supported by the underlying CPUE database.
35	GB (England)	51˚05'N	00˚13'W	Cottesmore School Pond (1994)	48	3.9	no	no	Copp et al. (2002), underlying field data showed monthly mean capture of about 30 fish per hour by electrofishing.
36	GB (England)	51˚05'N	00˚13'W	Cottesmore School (2006)	56	2.8	no	no	Cucherousset et al. (2009), based on number of fish processed (100), but underlying trapping data (CPUE) data from Villeneuve et al. (2005) indicate low density (5 fish/fish/minnow trap).
37	GB (England)	51˚05'N	00˚13'W	Cottesmore Middle Pond	55	3.1	no	yes	Fox et al. (2011), also underlying trapping data (CPUE) data from Villeneuve et al. (2005) was 46 fish/fish/minnow trap
38	GB (England)	51˚05'N	00˚13'W	Cottesmore Lower Pond	53	3.1	no	yes	Fox et al. (2011), also the underlying trapping data (CPUE) data from Villeneuve et al. (2005) was 57 fish/fish/minnow trap
39	GB (England)	51˚06'N	00˚13'W	Island Pond	54	3	no	no	Villeneuve et al. (2005) – the underlying capture data was 67 fish/hr electrofishing
40	GB (England)	51˚06'N	00˚13'W	Douster Pond	49	2.8	no	no	Villeneuve et al. (2005) – the underlying capture data was 60 fish/hr electrofishing
41	GB (England)	51˚07'N	02˚58'W	Dunwear Pond	67	2.5	no	no	Villeneuve et al. (2005) – the underlying capture data was 35 fish/hr sampling
42	GB (England)	50˚39'N	01˚11˚W	Airport Pond	72	2.43	trans	no	Cucherousset et al. (2009) – the underlying capture data was <30 fish/hr sampling, corresponding to the 29 processed fish reported in the article.
43	Greece	41˚11'N	23˚08'E	Kerkini Reservoir	88	2	yes	yes	Neophitous and Giapis (1994), which is based on Giapis (2003) in which data indicate 30 fish captured per hour with traps.
44	Netherlands	51˚23'N	05˚30'E	Meeuwven Pond (2006)	55	2	no	yes	Cucherousset et al. (2009), based on numbers processed.
45	Netherlands	51.281	5.4395	Dommeldalpond 1	77	2	trans	no	Van Kleef & Jongejans (2014) - based on density data in Supplementary Table S1
46	Netherlands	51.2809	5.4394	Dommeldalpond 2	72	2	trans	no	Van Kleef & Jongejans (2014) - based on density data in Supplementary Table S1
47	Netherlands	51.4344	5.3194	Grootmeer	80	1.8	yes	no	Van Kleef & Jongejans (2014) - based on density data in Supplementary Table S1
48	Netherlands	51.3713	4.9426	GroteKlotteraard*	86	1.6	yes	no	Van Kleef & Jongejans (2014) - based on density data in Supplementary Table S1
49	Netherlands	51.1028	5.9156	Kranenbroekerven	66	1.8	trans	yes	Van Kleef & Jongejans (2014) - based on density data in Supplementary Table S1
50	Netherlands	51.3927	5.4662	Woldersven	76	2	trans	no	Van Kleef & Jongejans (2014) - based on density data in Supplementary Table S1
51	Netherlands	51.3908	5.5005	Meeuwven (2009)	54	2.8	no	no	Van Kleef & Jongejans (2014) - based on density data in Supplementary Table S1
52	Netherlands	51.1379	6.1094	Gitstappermolen	57	2	no	no	Van Kleef & Jongejans (2014) - based on density data in Supplementary Table S1
53	Netherlands	51.4135	5.5102	Rietven	54	2.2	no	yes	Van Kleef & Jongejans (2014) - based on density data in Supplementary Table S1
54	Netherlands	52.9517	6.2579	Schoapedobbe	79	1.8	yes	no	Van Kleef & Jongejans (2014) - based on density data in Supplementary Table S1
55	Netherlands	51.6491	5.6287	Udenpond 1	88	2	yes	no	Van Kleef & Jongejans (2014) - based on density data in Supplementary Table S1
56	Netherlands	51.6522	5.632	Udenpond 2	59	2.5	no	no	Van Kleef & Jongejans (2014) - based on density data in Supplementary Table S1
57	Netherlands	51.6742	5.6432	Udenpond 4	46	1.6	no	yes	Van Kleef & Jongejans (2014) - based on density data in Supplementary Table S1
58	Netherlands	51.3708	4.9355	Zwartwater*	75	2	trans	no	Van Kleef & Jongejans (2014) - based on density data in Supplementary Table S1
59	Romania	44˚36'N	27˚10'E	Lake Fundata	94	2	yes	yes	Constantinescu (1981) in which 131 fish were processed, but no mention of total captured over two days with a small seine net, nor mention of time spent sampling. However, several Romanian article refer to the species as invasive, reporting large numbers captured (Wilhelm et al. 2002; Stavrescu-Bediva et al. 2014), or proliferating in backwaters and draining canals (Telcean & Cupşa 2009).
60	Slovakia	48˚06'N	17˚29'E	River Danube side channel	80	2.5	trans	no	Fox & Copp (2014), only 70 specimens, and although Tomeček et al. (2007) stated in general terms pumpkinseed to be invasive in the Danube and its side channels, relative density data given in Černý et al. (2003) showed the species not to be invasive in Danube side channels.
61	Spain	37˚55'N	05˚00'W	Rió Guadiato	93	1.4	yes	yes	Gutiérrez-Estrada et al. (2000), with reports of the species as very abundant or invasive (De Miguel et al. 2014; Ribeiro and Collares‐Pereira 2010)
62	Spain	42˚08'N	02˚45'E	Lake Banyoles	98	2	yes	yes	García-Berthou&Moreno-Amich (2000), Vila-Gispert et al. (2002)
63	Spain	41˚58'N	02˚30'E	Susqueda Reservoir	88	2	no	yes	Naspleda et al. (2012) reports low numbers (43) processed but Benejam et al. (2010) and Ashenden et al. (2017) both report pumpkinseed is one of dominant fish species in the reservoir.
64	Spain	42˚21'N	02˚48'E	Boadella Reservoir	86	1.4	yes	yes	Naspleda et al. (2012), but Santos et al. (2012) reports pumpkinseed to be of "intermediate abundance"
65	Spain	41˚18'N	00˚21'E	Riba-roja (a.k.a. Ribaroja) Reservoir	102	1.9	no	yes	Naspleda et al. (2012), but Benejam et al. (2010) refers to pumpkinseed as one of the dominant species
66	Spain	42˚12'N	03˚06'E	River Fluvià	90	1.5	yes	yes	Naspleda et al. (2012) refers to pumpkinseed being abundant
67	Spain	42˚15'N	03˚06'E	River Muga	73	2	trans	no	Naspleda et al. (2012) refers to pumpkinseed being abundant
68	Spain	42˚01'N	03˚12'E	River Ter	76	2.1	trans	yes	Naspleda et al. (2012) and Ashenden et al. (2017) refer to pumpkinseed being abundant
69	Spain	38˚17'N	01˚41'W	River Segura	93	1	yes	no	Naspleda et al. (2012) refers to pumpkinseed being abundant
70	Spain	38˚10'N	01˚21'W	Ojós Reservoir	96	1.13	yes	no	Naspleda et al. (2012), low numbers processed and no other evidence found to the contrary
71	Spain	41˚23'N	00˚55'E	Flix Reservoir	103	1.24	yes	yes	Carol et al. (2009), Benejam et al. (2010) and Benito et al. (2015) refer to pumpkinseed as one of the dominant species
72	Turkey	40'44'38'N	26'30'20E	Ipsala Canal	61	1.7	trans	no	Ağdamar et al. (2015), based on underlying field sampling database.
73	Turkey	40'47'11'N	30'05'33E	Bayraktar Reservoir	70	1.7	trans	no	Ağdamar et al. (2015), based on underlying field sampling database.
74	Turkey	40'48'35'N	29'59'37E	Çayırkoy Reservoir	65	1.6	trans	yes	Ağdamar et al. (2015), based on underlying field sampling database.
75	Turkey	40'54'21'N	30'02'29E	Davuldere Reservoir	62	1.5	trans	no	Ağdamar et al. (2015), based on underlying field sampling database.
76	Turkey	37'21'05'N	27'44'50E	Sarıçay Reservoir	78	1.7	yes	yes	Ağdamar et al. (2015), based on underlying field sampling database.
