# Supplementary material for: Can Invasiveness in Freshwater Fishes Be Predicted From Life-History Traits?
Source: Frontiers journal article supplement (doi:10.3389/fevo.2020.605287), 2020-12-23
Supplement: Table_2.docx [file Table_2.docx]

**REFERENCES cited in Table S1 but not in the main article.**

Ashenden, T., Rooke, A. C. and Fox, M. G. (2017). Boldness and dispersal tendency of native and invasive pumpkinseed (*Lepomis gibbosus*): is spatial sorting creating superior invaders. *Aquat. Invas.* 12, 311–320. doi: 10.3391/ai.2017.12.3.05

Benejam, L., Benito, J. and García-Berthou, E. (2010). Decreases in condition and fecundity of freshwater fishes in a highly polluted reservoir. *Water Air Soil Pollut.* 210(1–4), 231–242. doi.org/10.1007/s11270-009-0245-z

Benito, J., Benejam, L., Zamora, L. and García-Berthou, E. (2015). Diel cycle and effects of water flow on activity and use of depth by common carp. *Trans. Am. Fish. Soc.* 144, 491–501.

Carol, J., Benejam, L., Benito, J. and García-Berthou, E. (2009). Growth and diet of European catfish (*Silurus glanis*) in early and late invasion stages. *Fund. Appl. Limnol.* 174, 317–328.

Carpentier, A., Paillisson, J. M. and Marion, L. (2003). Effet du niveau d’eau sur la communauté piscicole du lac de Grand-Lieu. Rapport préliminaire interne au conseil scientifique de la Réserve Naturelle du Lac de Grand-Lieu. available at: https://ecobio.univ-rennes1.fr/Fiches_perso/JMPaillisson/Carpentier%20et%20al_2003.pdf

Carpentier, A., Paillisson, J. M. and Marion, L. (2004). Etude des changements du peuplement ichtyologique du lac de Grand-Lieu et conséquences sur l’impact du Grand-Cormoran. Université Rennes. Rapport de suite interne au conseil scientifique de la Réserve Naturelle du Lac de Grand-Lieu available at: https://ecobio.univ-rennes1.fr/Fiches_perso/JMPaillisson/Carpentier%20et%20al_%202000_01.pdf

Costa, C., 2005. Atlas des espèces invasives présentes sur le périmètre du parc naturel régional de Camargue. Parc Naturel Régional de Camargue, p. 217. available at: www.parc-camargue.fr/getlibrarypublicfile.php/7c665ee39b0bbaacb72308e0d3b92ea0/parc-camargue/_/collection_library_fr/201100142/0001/Especes_invasives_Camargue.pdf

Crivelli, A. J. and Mestre, D. (1988). Life history traits of pumpkinseed, *Lepomis gibbosus*, introduced into the Camargue, a Mediterranean wetland. *Arch. Hydrobiol.* 111, 449–466.

Cucherousset, J., Carpentier, A. and Paillisson, J. M. (2008). Selective use and spatial distribution of native and non‐native fish in wetland habitats. *River Res. Appl.* 24, 1240–1250. doi: 10.1002/rra.1149

Cucherousset, J., Paillisson, J. M., Carpentier, A. & Chapman, L. J. (2007). Fish emigration from temporary wetlands during drought: the role of physiological tolerance. *Fund. Appl. Limnol.* 168, 169–178. doi: 10.1127/1863-9135/2007/0168-0169

Černý, J., Copp, G. H., Kováč, V., Gozlan, R. E. and Vilizzi, L. (2003). Initial impact of the Gabčíkovo hydroelectric scheme on 0+ fish assemblages in the Slovak flood plain, River Danube. *River Res. Appl.* 19, 749–766. doi: 10.1002/rra.716

Cucherousset, J., Paillisson, J. M., Carpentier, A. and Chapman, L. J. (2007). Fish emigration from temporary wetlands during drought: the role of physiological tolerance. *Fund. Appl. Limnol.* 168, 169–178. doi: 10.1127/1863-9135/2007/0168-0169

Dembski, S., Masson, G., Monnier, D., Wagner, P. & Pihan, J. C. (2006). Consequences of elevated temperatures on life-history traits of an introduced fish, pumpkinseed *Lepomis gibbosus. J. Fish Biol.* 69, 331–346. doi:10.1111/j.1095-8649.2006.01087.x

Fox, M. G. and Crivelli, A. J. (1998). Body size and reproductive allocation in a multiple spawning centrarchid. *Can. J. Fish. Aquat. Sci.* 55, 737–748.

Fox, M. G. and Crivelli, A. J. (2001). Life history traits of pumpkinseed (Lepomis gibbosus) populations introduced into warm thermal environments. *Arch. Hydrobiol.* 150, 561–580.

Giapis, A.I. (2003) Ecological study of pumpkinseed (*Lepomis gibbosus* (L.)) in Lake Kerkini. PhD dissertation, Aristotle University of Thessaloniki, Department of Forestry and Natural Environment Division, 234 p.

García-Berthou, E. & Moreno-Amich, R. (2000). Food of introduced pumpkinseed sunfish: ontogenetic diet shift and seasonal variation. *J. Fish Biol.* 57, 29–40. doi:10.1006/jfbi.2000.1285

Jakubčinová, K. and Kováč, V. (2015). Predbežná analýza dynamiky ichtyocenóz slovenského úseku Dunaja v posledných dvoch desaťročiach [A preliminary analysis of the fish communities' dynamic in the Slovak section of the Danube in last two decades.] Unpublished manuscript. In Slovak with English abstract. Available at: https://inis.iaea.org/collection/NCLCollectionStore/_Public/47/082/47082722.pdf

Masson, G., Valente, E., Fox, M. G., and Copp, G. H. (2015). Thermal influences on life-history traits and reproductive effort of introduced pumpkinseed sunfish *Lepomis gibbosu*s in the River Moselle basin (northeastern France). *River Res. Appl.* 31, 563–575. doi: 10.1002/rra.2761

Masson, G., Valente, E. and Vanacker, M. (2011). Analyse des relations entre les stratégies démographiques de la perche soleil (*Lepomis gibbosus*) et la température dans la vallée de la Moselle. Report prepared for ONEMA. Cited in Vanacker (2011).

Naspleda, J., Vila-Gispert. A., Fox, M. G., Zamora, L. and Ruiz-Navarro, A. (2012). Morphological variation between non-native lake- and stream-dwelling pumpkinseed *Lepomis gibbosus* in the Iberian Peninsula. *J. Fish Biol.* 81, 1915–935. doi:10.1111/j.1095-8649.2012.03416.x

Neophitous, C. and Giapis, A.J. (1994). A study of the biology of pumpkinseed (*Lepomis gibbosus* (L.)) in Lake Kerkini (Greece). *J. Appl. Ichthyol.* 10, 123–133.

Poulet, N. 2004. Le sandre (*Sander lucioperca* (L.)) : Biologie, comportement et dynamique des populations en Camargue (Bouches du Rhône, France). Thèse de Doctorat, Université de Toulouse. 279 pp. (including annexes)

Santos, L. N., Agostinho, A. A., Alcaraz, C., Carol, J., Santos, A. F., Tedesco, P. and García-Berthou, E. (2011). Artificial macrophytes as fish habitat in a Mediterranean reservoir subjected to seasonal water level disturbances. *Aquat. Sci.* 73, 43–52. doi: 10.1007/s00027-010-0158-3

Stavrescu-Bedivan, M. M., Popa, O. P. and Popa, L. O. (2014). Infestation of *Lernaea cyprinacea* (Copepoda: Lernaeidae) in two invasive fish species in Romania, *Lepomis gibbosus* and *Pseudorasbora parva. Knowl. Manag. Aquat. Ecosys.* 414, 12. doi: 10.1051/kmae/2014024

Telcean, I. C. and Cupşa, D. (2009). The backwaters and drainage canals as natural refuges for the lowland rivers’ fishfauna (Someş, Crişuri, and Mureş Rivers-north-western Romania). *Biharean Biologist* 3, 37–44.

Tomeček, J., Kováč, V. and Katina, S. (2007). The biological flexibility of the pumpkinseed: a successful colonizer throughout Europe. pp. 289–306 In: F. Gherardi (ed.) Biological invaders in inland waters: Profiles, distribution, and threats. Springer, Berlin.

Vanacker, M. (2011) Infuence de la température sur le potentiel invasif de la perche soleil *Lepomis gibbosus*. Rapport de recherche, Université de Metz, Laboratoire d’Interactions Ecotoxicologie, Biodiversité et Ecosystème. Available at: https://hal.archives-ouvertes.fr/hal-02920167/document

Wilhelm, A., Harka, A. and Sallai, Z. (2002). The prevailing anthropogenic effects on certain smaller northwestern Romanian Rivers. *Tiscia Monogr. Ser.* 6, 187–198.
